# Supplementary material for: DNMT3B silencing suppresses migration and invasion by epigenetically promoting miR-34a in bladder cancer
Source: publisher site journal article supplement (doi:10.18632/aging.103820), 2020-11-20
Supplement: Supplementary file [file aging-v12i23-103820-supplementary-material-SD1.pdf]

SUPPLEMENTARY FIGURE

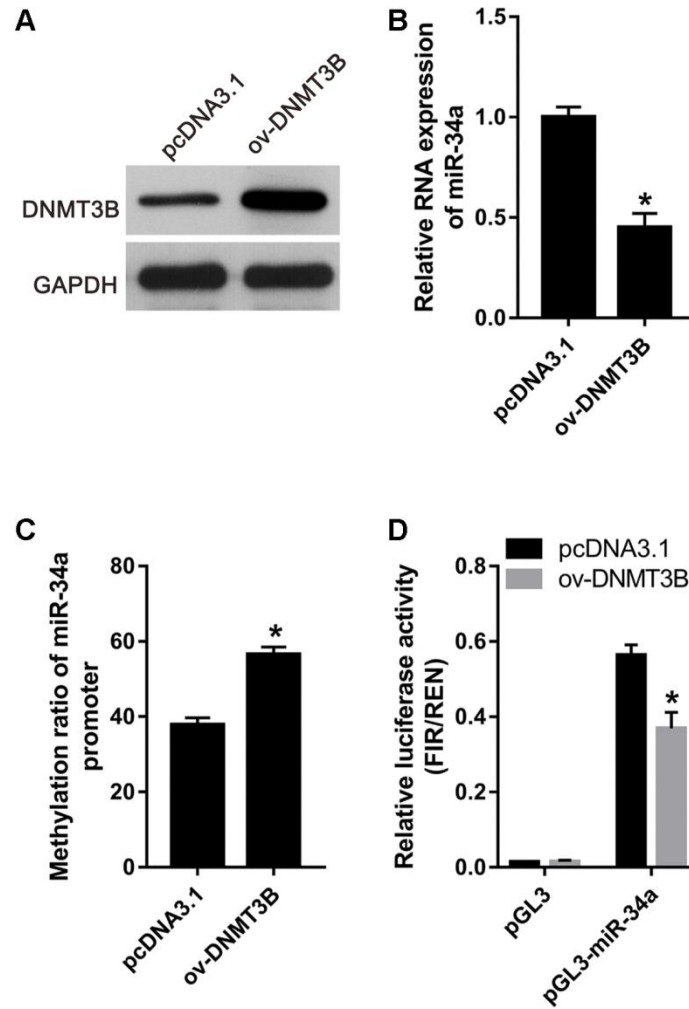

**Supplementary Figure 1. The overexpression of *DNMT3B* decreased miR-34a expression and increased the methylation of the miR-34a promoter.** *DNMT3B* overexpression plasmid (ov-DNMT3B) or empty plasmid pcDNA3.1 was transfected into BIU-87 cells. Forty-eight h later, cells were harvested and the expression of DNMT3B protein (A), miR-34a (B), and the methylation ratio of the miR-34a promoter (C) were determined by western blot (A), qRT-PCR (B), and bisulfite genomic sequencing (C), respectively. After transfected with ov-DNMT3B or pcDNA3.1 for 24 h later, a luciferase reporter plasmid containing the miR-34a promoter (pGL3-miR-34a) was transfected into BIU-87 cells to perform luciferase assays (D). The empty vector pGL3 was used as the control. The relative luciferase activity was calculated using the ratio of firefly and Renilla luciferase activities (D). Data were presented as means±SD. \*p<0.05 between pcDNA3.1 and ov-DNMT3B. DNMT3B, DNA methyltransferase 3B; qRT-PCR, quantitative reverse transcription polymerase chain reaction; SD, standard deviation.
