# Supplementary material for: DNMT3B silencing suppresses migration and invasion by epigenetically promoting miR-34a in bladder cancer
Source: publisher site journal article supplement (doi:10.18632/aging.103820), 2020-11-20
Supplement: Supplementary file [file aging-v12i23-103820-supplementary-material-SD2.pdf]

## SUPPLEMENTARY TABLE

**Supplementary Table 1. Primers used for qRT-PCR.**

| <b>ID</b>         | <b>sequence</b>                               |
|-------------------|-----------------------------------------------|
| miR-34a-F         | ACACTCCAGCTGGGTGGCAGTGTCTTAGCTGGT             |
| miR-34a-R         | CTCAACTGGTGTTCGTGGA                           |
| miR-34a-RT        | CTCAACTGGTGTTCGTGGAGTCGGCAATTCAGTTGAGACAACCAG |
| U6-F              | CTCGCTTCGGCAGCACA                             |
| U6-R              | AACGCTTCACGAATTTGCGT                          |
| U6-RT             | AACGCTTCACGAATTTGCGT                          |
| HNF-4 $\gamma$ -F | TGCGTGTTACACAGCGGACCT                         |
| HNF-4 $\gamma$ -R | TGGCATTACCCGCGTGCCTT                          |
| NOTCH1-F          | CATCTTGAGCACTAAGCCT                           |
| NOTCH1-R          | GAGATAGACCAGTGGAGACA                          |
| 8s-F              | CCTGGATACCGCAGCTAGGA                          |
| 18s-R             | GCGGCGCAATACGAATGCCCC                         |

F: forward primer; R: reverse primer; RT: reverse transcription primer.
